# Supplementary material for: The Reentry Helix Is Potentially Involved in Cholesterol Sensing of the ABCG1 Transporter Protein
Source: MDPI journal article supplement (doi:10.3390/ijms232213744), 2022-11-08
Supplement: s1 [file s1]

## Supplementary Material

# The reentry helix is potentially involved in cholesterol sensing of the ABCG1 transporter protein

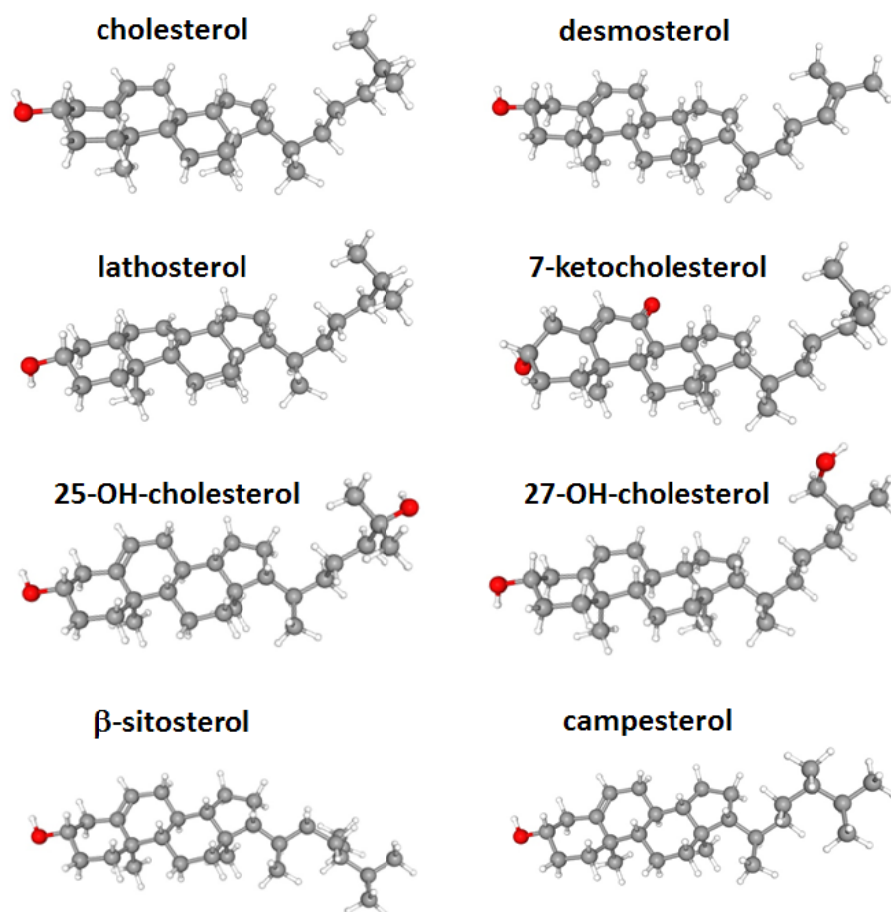

**Supplementary Figure S1.** Chemical structures of the studied sterol compounds. Sticks and balls representations of various sterols are from PubChem (<https://pubchem.ncbi.nlm.nih.gov/>). CIDs are as follows: cholesterol – 5997; desmosterol – 439577; lathosterol – 65728; 7-ketocholesterol – 91474; 25-hydroxycholesterol – 65094; 27-hydroxycholesterol – 123976;  $\beta$ -sitosterol – 222284; campesterol – 173183. Carbon and hydrogen atoms are represented by gray and white balls, respectively, whereas oxygen atoms are indicated by red balls.

```

1  MACLMAAFSV  GTAMNASSYS  AEMTEPKSVC  VSVDEVVSSN  MEATETDLLN  GHLKKVDNNL
61  TEAQRFSLLP  RRAAVNIEFR  DLSYSVPEGP  WWRKKGYKTL  LKGISGKFNS  GELVAIMGPS
121 GAGKSTLMNI  LAGYRETGMK  GAVLINGLPR  DLRCFRKVSC  YIMQDDMLLP  HLTVQEAMMV
181 SAHLKLQEKD  EGRREMVKEI  LTALGLLSCA  NTRTGSLSGG  QRKRLAIALE  LVNNPPVMFF
241 DEPTSGLDSA  SCFQVVSLMK  GLAQGGRSII  CTIHQPSAKL  FELFDQLYVL  SQGQCVYRGK
301 VCNLVPYLRD  LGLNCPTYHN  PADFVMEVAS  GEYGDQNSRL  VRVREGMCD  SDHKRDLGGD
361 AEVNPFLWHR  PSEEDSSSME  GCHSFSASCL  TQFCILFKRT  FLSIMRDSVL  THLRITSHIG
421 IGLLIGLLYL  GIGNEAKKVL  SNSGFLFFSM  LFLMFALMP  TVLTFPLEMG  VFLREHLNYW
481 YSLKAYYLAK  TMADVPFQIM  FPVAYCSIVY  WMTSQPSDAV  RFVLFAALGT  MTSLVAQSLG
541 LLIGAASTSL  QVATFVGPIV  AIPVLLFSGF  FVSFDTIPTY  LQWMSYISYV  RYGFEGVILS
601 IYGLDREDLH  CDIDETCHFQ  KSEAILRELD  VENAKLYLDF  IVLGIFFISL  RLIAYFVLRY
661 KIRAER

```

**Supplementary Figure S2.** Cholesterol-interacting sequences in ABCG1. Amino acid sequence of the short isoform of human ABCG1 with the studied Cholesterol Recognition Amino acid Consensus (CRAC) and Steroid-Binding Element (SBE) motifs highlighted. The consensus sequences for CRAC and SBE motifs are L/V-X<sub>1-5</sub>-Y-X<sub>1-5</sub>-R/K and (L/M-XX-)JL-XX-L, respectively.

| ABCG1 variant |         |       |       |       |       |       | mean         | SEM         |
|---------------|---------|-------|-------|-------|-------|-------|--------------|-------------|
| wt            | basal   | 19.79 | 26.19 | 15.32 | 20.36 |       | <b>20.41</b> | <b>2.23</b> |
|               | Chol    | 39.01 | 45.40 | 49.74 | 45.63 |       | <b>44.94</b> | <b>2.22</b> |
|               | Rhod123 | 39.99 | 37.72 | 43.19 | 41.29 |       | <b>40.55</b> | <b>1.15</b> |
| L430A         | basal   | 17.08 | 16.51 | 16.55 | 20.89 |       | <b>17.76</b> | <b>1.05</b> |
|               | Chol    | 26.62 | 25.53 | 24.12 | 34.20 |       | <b>27.62</b> | <b>2.25</b> |
|               | Rhod123 | 24.62 | 25.53 | 25.53 | 31.82 |       | <b>26.88</b> | <b>1.66</b> |
| F571A         | basal   | 17.24 | 23.74 | 13.08 |       |       | <b>18.02</b> | <b>3.10</b> |
|               | Chol    | 19.53 | 22.46 | 14.59 |       |       | <b>18.86</b> | <b>2.30</b> |
|               | Rhod123 | 16.30 | 18.17 | 7.96  |       |       | <b>14.14</b> | <b>3.14</b> |
| L626A         | basal   | 30.28 | 19.60 | 14.07 |       |       | <b>21.32</b> | <b>4.76</b> |
|               | Chol    | 29.21 | 17.03 | 14.02 |       |       | <b>20.09</b> | <b>4.64</b> |
|               | Rhod123 | 29.88 | 18.74 | 12.05 |       |       | <b>20.22</b> | <b>5.20</b> |
| Y586A         | basal   | 9.47  | 7.63  | 7.15  | 4.77  |       | <b>7.25</b>  | <b>0.97</b> |
|               | Chol    | 15.69 | 12.07 | 9.96  | 6.73  |       | <b>11.11</b> | <b>1.88</b> |
|               | Rhod123 | 12.86 | 8.05  | 7.29  | 9.11  |       | <b>9.33</b>  | <b>1.23</b> |
| Y655A         | basal   | 16.81 | 8.15  | 10.01 | 4.47  |       | <b>9.86</b>  | <b>2.59</b> |
|               | Chol    | 18.28 | 9.01  | 10.57 | 5.19  |       | <b>10.76</b> | <b>2.75</b> |
|               | Rhod123 | 18.55 | 10.15 | 11.56 | 4.90  |       | <b>11.29</b> | <b>2.81</b> |
| Y660A         | basal   | 23.69 | 27.96 |       | 20.47 |       | <b>24.04</b> | <b>2.17</b> |
|               | Chol    | 44.61 | 47.28 |       | 35.64 |       | <b>42.51</b> | <b>3.52</b> |
|               | Rhod123 | 43.91 | 51.94 |       | 42.48 |       | <b>46.11</b> | <b>2.94</b> |
| β-gal         | basal   | 10.19 | 6.29  | 2.43  | 3.57  | 7.74  | <b>6.04</b>  | <b>1.40</b> |
|               | Chol    |       |       | 4.43  | 4.14  | 10.81 | <b>6.46</b>  | <b>2.18</b> |
|               | Rhod123 |       |       | 2.28  | 3.28  | 11.68 | <b>5.75</b>  | <b>2.98</b> |

**Supplementary Table S1.** Parallel measurements of ATPase activity of various ABCG1 variants. The vanadate-sensitive ATPase activities of Sf9 cell membrane preparations containing the indicated ABCG1 variants were determined in the absence (basal) and presence of cyclodextrin-complexed cholesterol (Chol), as well as in the presence of rhodamine 123 (Rhod123). For negative control, Sf9 cell membrane preparations containing β-galactosidase (β-gal) were used. The values represent the vanadate-sensitive ATPase activities in nmol Pi/mg protein/min units.

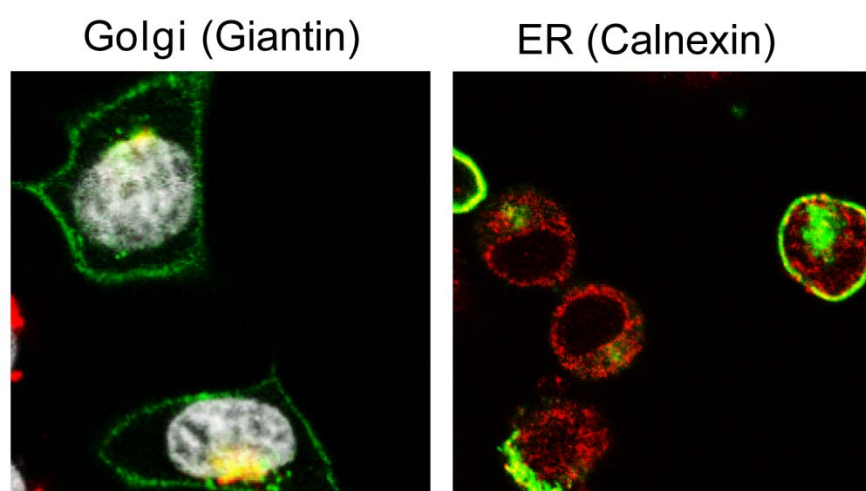

**Supplementary Figure S3.** Subcellular localization of ABCG1. HeLa cells were transfected with the short isoform of ABCG1 (G1-S) and immunostained with antibodies against ABCG1 (green) and cellular markers, such as giantin or calnexin (red) for the Golgi apparatus or endoplasmic reticulum, respectively. On the left panel the cell nuclei were also counterstained with Hoechst 33342 dye (grey).

| HeLa   | 12/10 | 01/14 | 01/21 | 01/28 | 02/25 | 03/04 | 05/13 | 05/14 | 05/15 | 07/29 | mean  | SEM  |
|--------|-------|-------|-------|-------|-------|-------|-------|-------|-------|-------|-------|------|
| WT     | 19.29 | 10.05 | 9.79  | 10.39 | 12.69 | 29.74 | 26.00 | 23.93 | 29.76 | 27.17 | 19.88 | 2.67 |
| G1KM   | 3.40  | 6.40  | 5.72  | 3.26  | 3.39  | 4.55  | 4.23  | 9.42  | 9.62  | 10.83 | 6.08  | 0.91 |
| L430A  | 20.95 | 22.71 | 11.70 | 12.03 | 9.73  | 19.95 | 21.08 | 27.23 | 36.50 | 39.31 | 22.12 | 3.16 |
| F571A  | 6.89  | 7.86  | 6.39  | 4.80  | 5.24  | 3.47  | 6.22  | 12.78 | 16.58 | 15.32 | 8.55  | 1.46 |
| L626A  | 4.63  | 7.57  | 5.98  | 3.56  | 7.21  | 3.63  | 5.00  | 8.57  | 9.57  | 17.01 | 7.27  | 1.26 |
| Y586A  | 4.97  | 4.35  | 2.42  | 2.02  | 5.78  | 2.60  | 2.12  | 11.09 | 5.30  | 8.99  | 4.96  | 0.96 |
| Y655A  | 3.60  | 7.19  | 5.94  | 6.62  | 3.24  | 4.14  | 2.30  | 11.48 | 5.87  | 11.17 | 6.16  | 0.99 |
| Y660A  | 14.15 | 12.16 | 9.10  | 2.72  | 5.57  | 8.75  | 2.38  | 22.70 | 20.37 | 25.49 | 12.34 | 2.60 |
| G1-L   | n.d.  | 13.93 | 6.69  | 10.74 | 9.83  | 18.36 | 37.79 | 21.21 | 29.08 | 28.05 | 19.52 | 3.47 |
| G1-LKM | n.d.  | 6.59  | 3.87  | 1.98  | 5.58  | 3.67  | 2.11  | 7.53  | 4.68  | 10.03 | 5.12  | 0.87 |
| HEK293 |       | 01/14 | 01/21 | 01/28 | 02/25 | 03/04 | 05/13 | 05/14 | 05/15 |       | mean  | SEM  |
| WT     | n.d.  | 17.10 | 8.34  | 5.15  | 12.20 | 8.17  | 4.19  | 3.27  | 1.41  | n.d.  | 7.48  | 1.83 |
| G1KM   | n.d.  | 5.51  | 3.06  | 2.34  | 2.44  | 1.81  | 0.97  | 1.45  | 0.33  | n.d.  | 2.24  | 0.56 |
| L430A  | n.d.  | 7.56  | 3.75  | 7.67  | 12.93 | 13.53 | 2.75  | 9.25  | 4.64  | n.d.  | 7.76  | 1.42 |
| F571A  | n.d.  | 4.09  | 2.91  | 13.16 | 7.68  | 5.65  | 1.50  | 7.02  | 3.10  | n.d.  | 5.64  | 1.31 |
| L626A  | n.d.  | 3.93  | 2.61  | 5.48  | 0.40  | 3.86  | 1.20  | 4.27  | 0.87  | n.d.  | 2.82  | 0.65 |
| Y586A  | n.d.  | 4.77  | 2.74  | 4.60  | 8.51  | 4.22  | 3.18  | 6.30  | 1.54  | n.d.  | 4.48  | 0.77 |
| Y655A  | n.d.  | 6.10  | 2.59  | 1.16  | 3.10  | 2.78  | 1.14  | 2.90  | 0.41  | n.d.  | 2.52  | 0.62 |
| Y660A  | n.d.  | 5.77  | 3.27  | 10.61 | 7.66  | 5.78  | 1.24  | 4.87  | 2.65  | n.d.  | 5.23  | 1.05 |
| G1-L   | n.d.  | 8.26  | 7.01  | 7.43  | 10.54 | 7.33  | 1.90  | 7.43  | 5.04  | n.d.  | 6.87  | 0.89 |
| G1-LKM | n.d.  | 2.45  | 5.28  | 2.21  | 1.52  | 2.13  | 0.85  | 4.47  | 0.53  | n.d.  | 2.43  | 0.59 |

**Supplementary Table S2.** Parallel measurements of apoptotic effect of various ABCG1 mutants. Values represent the fraction of the apoptotic cells (%) in HeLa and HEK293 cell cultures transiently transfected with the indicated ABCG1 variant. Apoptotic cells were identified by Annexin V binding. For positive and negative controls, the wild type of the short isoform (WT) and its catalytically inactive variant (G1KM) were used respectively. For comparison the apoptotic effects of the long isoform (G1-L) and its inactive mutant variant (G1-LKM) were also assessed. n.d. – not determined

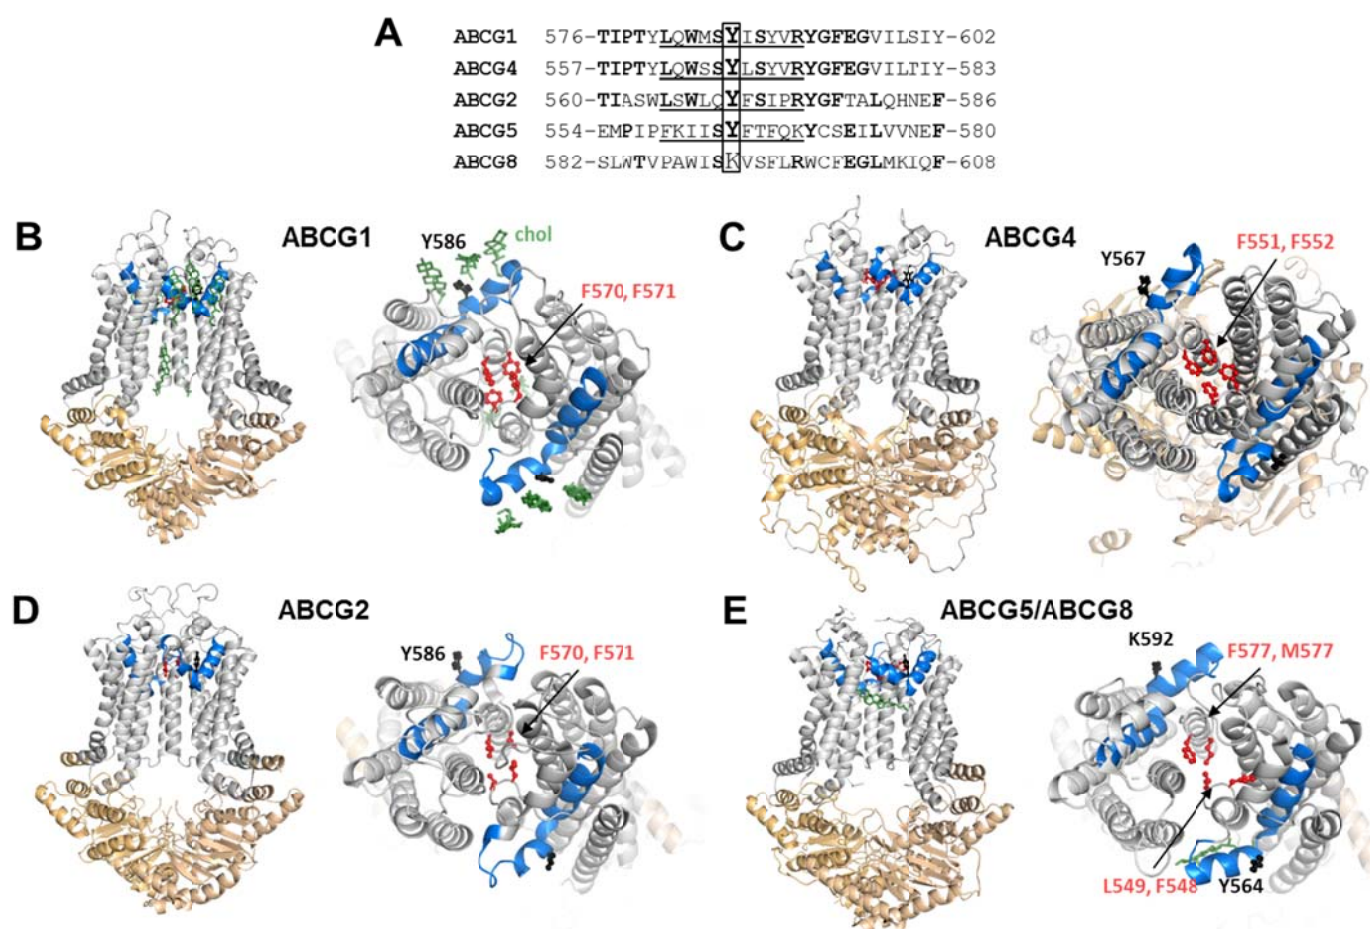

**Supplementary Figure S4.** Structural comparison of ABCG 1, ABCG4, ABCG2, and ABCG5/ABCG8. (A) Sequence alignment of the reentry regions based on structural alignments. CRAC motifs are underscored. Residues identical in two or three sequences are in bold. (B-E) Structures of ABCG1 (PDBID: 7r8d) [7], ABCG4 (<https://3dbeacon.hegelab.org/struct/hege-abc-0002>) [9], ABCG2 (PDBID: 6hco) [3], and ABCG5/ABCG8 (PDBID: 6cub) [2] are shown. NBD and TMD are colored with orange and grey colors, respectively. The reentry G-loop is indicated in blue. Tyrosine residues corresponding to ABCG1 Y586 are shown with black sticks and balls, as well as K592 in ABCG8, which lacks a CRAC motif in the G-loop. Residues corresponding to ABCG2 Leu-valve are represented by red sticks and balls. Green sticks indicate cholesterol molecules.
